# Supplementary material for: The Effect of Yeast Inoculation Methods on the Metabolite Composition of Sauvignon Blanc Wines
Source: MDPI journal article supplement (doi:10.3390/fermentation9080759), 2023-08-14
Supplement: s1 [file s1]

**Table S1.** Viability testing carried out for each ferments and treatments using Neubauer hemocytometer and methylene blue (0.1%) dye.

| Wine                  | Approximate Total Cell Concentration/mL                  | Approximate Viable Cell Concentration/mL                  | % of Viable Cells |
|-----------------------|----------------------------------------------------------|-----------------------------------------------------------|-------------------|
| <b>Rehydrated ADY</b> |                                                          |                                                           |                   |
| Control RY            | $1 \times 10^6$                                          | $7.5 \times 10^5$                                         | 75                |
| RY 1                  | $1 \times 10^7$                                          | $7.4 \times 10^6$                                         | 74                |
| RY2                   | $1 \times 10^8$                                          | $7.4 \times 10^7$                                         | 74                |
| RY3                   | $1 \times 10^9$                                          | $7.6 \times 10^8$                                         | 76                |
| SI RY 1               | $1 \times 10^6$ , then $1 \times 10^6$ at 10 and 0 °Brix | $7.3 \times 10^5$ ; $7.0 \times 10^5$ ; $6.3 \times 10^5$ | 73%, 70%, 63%     |
| SI RY 2               | $1 \times 10^6$ , then $1 \times 10^6$ at 0 °Brix        | $7.3 \times 10^5$ ; $6.0 \times 10^5$                     | 73%, 60%          |
| <b>Pre-Inoculum</b>   |                                                          |                                                           |                   |
| Control PI            | $1 \times 10^6$                                          | $7.4 \times 10^5$                                         | 74                |
| PI 1                  | $1 \times 10^7$                                          | $7.51 \times 10^6$                                        | 75                |
| PI 2                  | $1 \times 10^8$                                          | $7.4 \times 10^7$                                         | 74                |
| PI 3                  | $1 \times 10^9$                                          | $7.6 \times 10^9$                                         | 76                |
| SI PI 1               | $1 \times 10^6$ , then $1 \times 10^6$ at 10 and 0 °Brix | $7.4 \times 10^5$ ; $7.1 \times 10^5$ ; $6.2 \times 10^5$ | 74%, 71%, 62%     |
| SI PI 2               | $1 \times 10^6$ , then $1 \times 10^6$ at 0 °Brix        | $7.5 \times 10^5$ ; $6.1 \times 10^5$                     | 75%, 61%          |

**Table S2.** Odor Activity Value (OAV) of aroma compounds quantified in wines. RY= Rehydrated active dry yeast and PI= pre-inoculum prepared in rich medium.

| Treatment                 | Control_RY      | Control_PI      | Inoculation_RY_1 | Inoculation_PI_1 | Inoculation_RY_2 | Inoculation_PI_2 | Inoculation_RY_3 | Inoculation_PI_3 |
|---------------------------|-----------------|-----------------|------------------|------------------|------------------|------------------|------------------|------------------|
| Type of yeast inoculation | RY              | PI              | RY               | PI               | RY               | PI               | RY               | PI               |
| Cells                     | 10 <sup>6</sup> | 10 <sup>6</sup> | 10 <sup>8</sup>  | 10 <sup>8</sup>  | 10 <sup>10</sup> | 10 <sup>10</sup> | 10 <sup>12</sup> | 10 <sup>12</sup> |
| Isobutanol                | 0               | 0               | 0                | 0                | 1                | 0                | 1                | 0                |
| 1-butanol                 | 0               | 0               | 0                | 0                | 0                | 0                | 0                | 0                |
| Isoamylalcohol            | 3               | 3               | 3                | 3                | 3                | 3                | 4                | 3                |
| Benzaldehyde              | 0               | 0               | 0                | 0                | 0                | 0                | 0                | 0                |
| Benzyl alcohol            | 0               | 0               | 0                | 0                | 0                | 0                | 0                | 0                |
| Phenylethyl alcohol       | 28              | 35              | 26               | 21               | 33               | 26               | 34               | 26               |
| beta-damascenone          | 83              | 84              | 99               | 94               | 132              | 102              | 165              | 93               |
| alpha-ionone              | 1               | 1               | 0                | 2                | 6                | 6                | 6                | 2                |
| beta-ionone               | 30              | 23              | 27               | 31               | 24               | 21               | 36               | 30               |
| cis/trans-rose-oxide      | 0               | 0               | 0                | 0                | 0                | 0                | 0                | 0                |
| Linalool                  | 2               | 2               | 3                | 3                | 3                | 2                | 4                | 2                |
| Terpineol                 | 0               | 0               | 0                | 0                | 0                | 0                | 0                | 0                |
| Citronellol               | 0               | 0               | 0                | 0                | 0                | 0                | 0                | 0                |
| Nerol                     | 0               | 0               | 0                | 0                | 0                | 0                | 0                | 0                |
| Ethyl dihydrocinnamate    | 0               | 0               | 0                | 0                | 0                | 0                | 0                | 0                |
| Ethyl cinnamate           | 1               | 1               | 1                | 1                | 1                | 1                | 1                | 1                |
| Ethyl isobutyrate         | 1               | 0               | 1                | 0                | 0                | 0                | 1                | 0                |
| Ethyl butanoate           | 20              | 18              | 19               | 23               | 23               | 19               | 23               | 20               |
| Ethyl 2-methyl butanoate  | 0               | 0               | 0                | 0                | 1                | 0                | 1                | 0                |
| Ethyl isovalerate         | 0               | 0               | 0                | 0                | 0                | 0                | 1                | 0                |
| Ethyl hexanoate           | 24              | 22              | 21               | 24               | 24               | 23               | 25               | 23               |
| Ethyl octanoate           | 22              | 14              | 23               | 22               | 23               | 21               | 22               | 20               |
| Ethyl decanoate           | 25              | 17              | 30               | 27               | 28               | 21               | 32               | 24               |
| Ethyl acetate             | 4               | 3               | 3                | 3                | 3                | 2                | 4                | 3                |
| Isobutyl acetate          | 0               | 0               | 0                | 0                | 0                | 0                | 0                | 0                |
| Isoamyl acetate           | 123             | 90              | 100              | 97               | 103              | 95               | 117              | 89               |
| Hexylacetate              | 1               | 1               | 1                | 1                | 1                | 1                | 1                | 1                |
| cis-3-hexenyl acetate     | 0               | 0               | 0                | 0                | 0                | 0                | 0                | 0                |
| beta-phenylethyl acetate  | 1               | 1               | 1                | 1                | 1                | 1                | 1                | 1                |
| Isobutyric acid           | 5               | 3               | 4                | 4                | 3                | 3                | 3                | 4                |
| Isovaleric acid           | 3052            | 2258            | 2785             | 2732             | 2331             | 1892             | 2377             | 2412             |
| Hexanoic acid             | 8               | 7               | 8                | 9                | 7                | 7                | 7                | 7                |
| Octanoic acid             | 18              | 17              | 17               | 16               | 16               | 16               | 16               | 17               |
| Decanoic acid             | 4               | 4               | 4                | 4                | 4                | 4                | 3                | 4                |
| 3MH                       | 203             | 218             | 221              | 239              | 254              | 220              | 248              | 253              |
| 3MHA                      | 807             | 789             | 794              | 828              | 788              | 738              | 783              | 750              |
| 4MMP                      | 31              | 49              | 48               | 63               | 70               | 91               | 66               | 166              |
